# Supplementary material for: RETRACTED: Multipotent Stromal Cells from Subcutaneous Adipose Tissue of Normal Weight and Obese Subjects: Modulation of Their Adipogenic Differentiation by Adenosine A1 Receptor Ligands
Source: MDPI journal article supplement (doi:10.3390/cells10123560), 2021-12-17
Supplement: s1 [file s1]

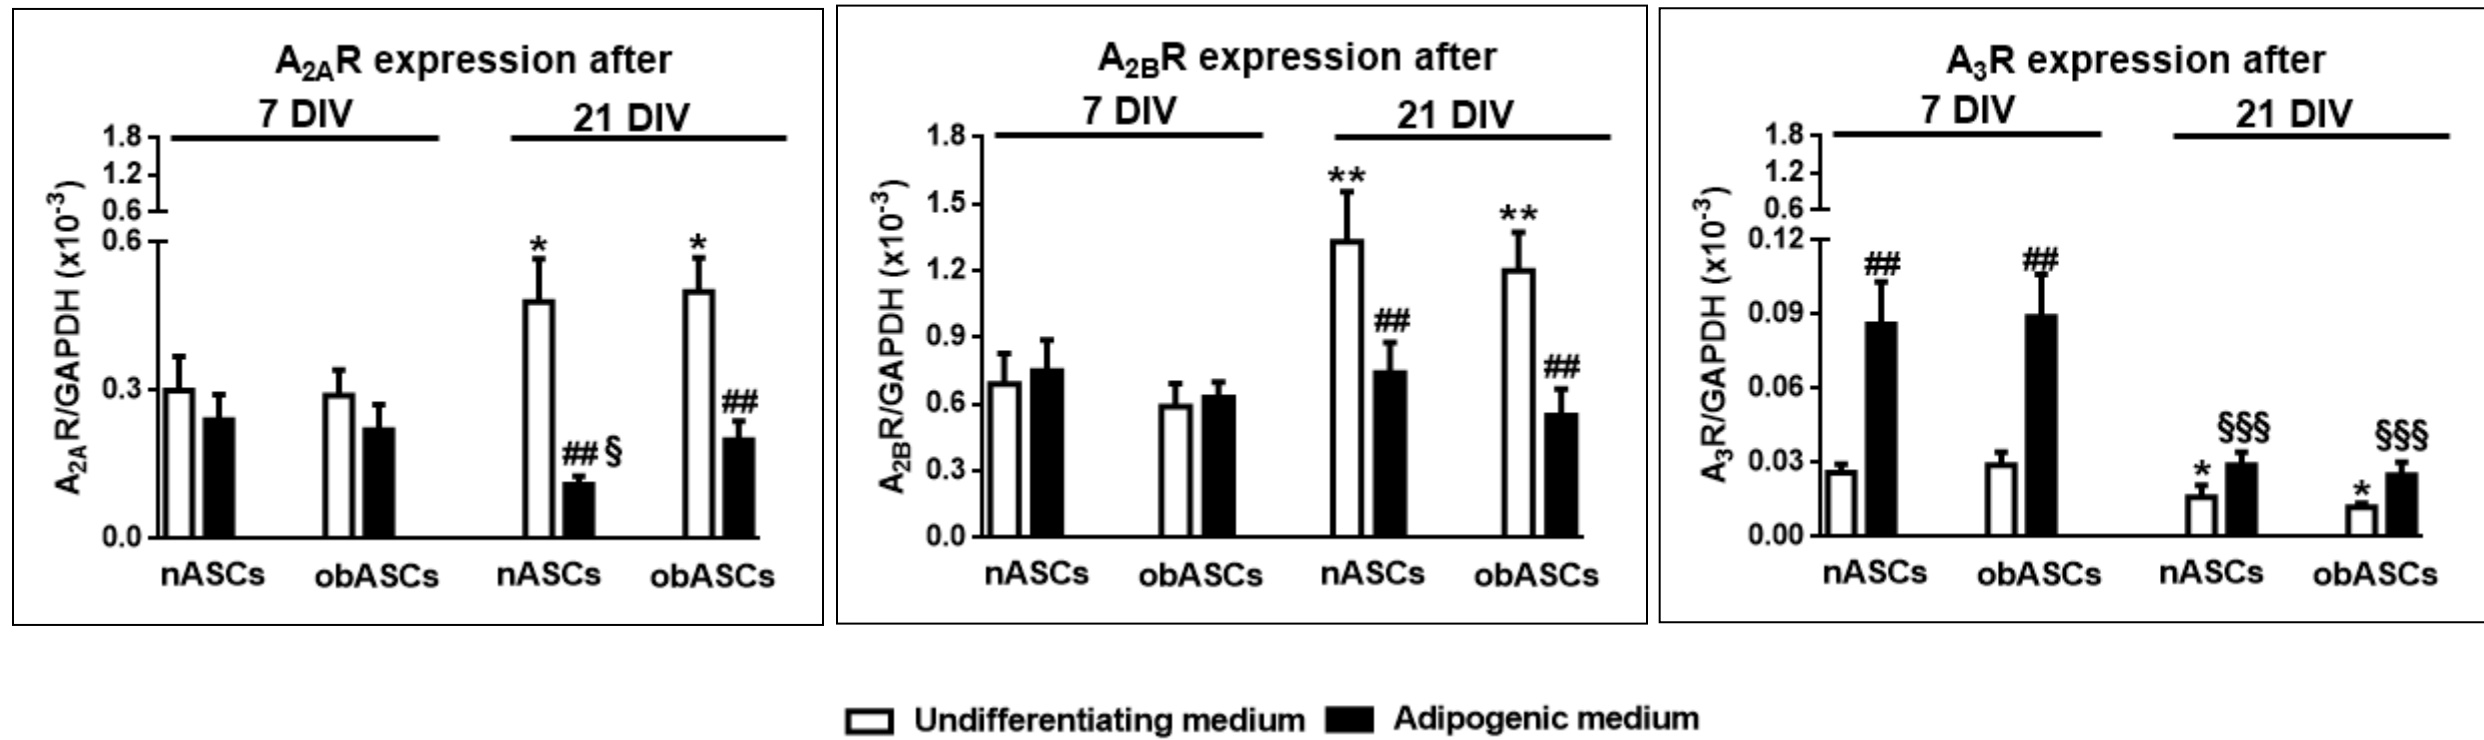

**Figure S1** Expression of adenosine receptors in ASCs of normal weight (nASCs) and obese (obASCs) subjects grown in undifferentiating or adipogenic medium for different time periods (7 and 21 days in vitro, DIV). The presence of the adenosine receptors has been evaluated by real time PCR and the expression of GAPDH was used as internal control. The results are the mean  $\pm$  SD (standard deviation) of three independent experiments, with cells from 3 different donors. \* $p < 0.05$ , \*\* $p < 0.01$ : statistical significance measured in ASCs grown for 21 DIV against the corresponding ones grown for 7 DIV in undifferentiating medium; ## $p < 0.01$ : statistical significance measured in ASCs of normal weight or obese subjects grown for 7 or 21 DIV in adipogenic medium vs the corresponding ASCs grown for the same time periods in undifferentiating medium; § $p < 0.05$  and §§§ $p < 0.001$ : statistical significance of values obtained in differentiated ASCs at 21 DIV vs the differentiated ASCs at 7 DIV (one-way ANOVA plus Tukey's test).
