# Supplementary material
Source: MDPI journal article supplement (https://www.mdpi.com/2073-4409/10/12/3560)
Supplement: s1 [file s1]

Archive with 1 entries (1 files):
- cells-1491035 Fig. 1 Suppl. (new).pdf
